# Supplementary material
Source: PubMed Central journal article supplement (PMC3382548)
Supplement: 1120476109_pnas.201120476SI.pdf [file 1120476109_pnas.201120476SI.pdf]

# Supporting Information

Foster et al. 10.1073/pnas.1120476109

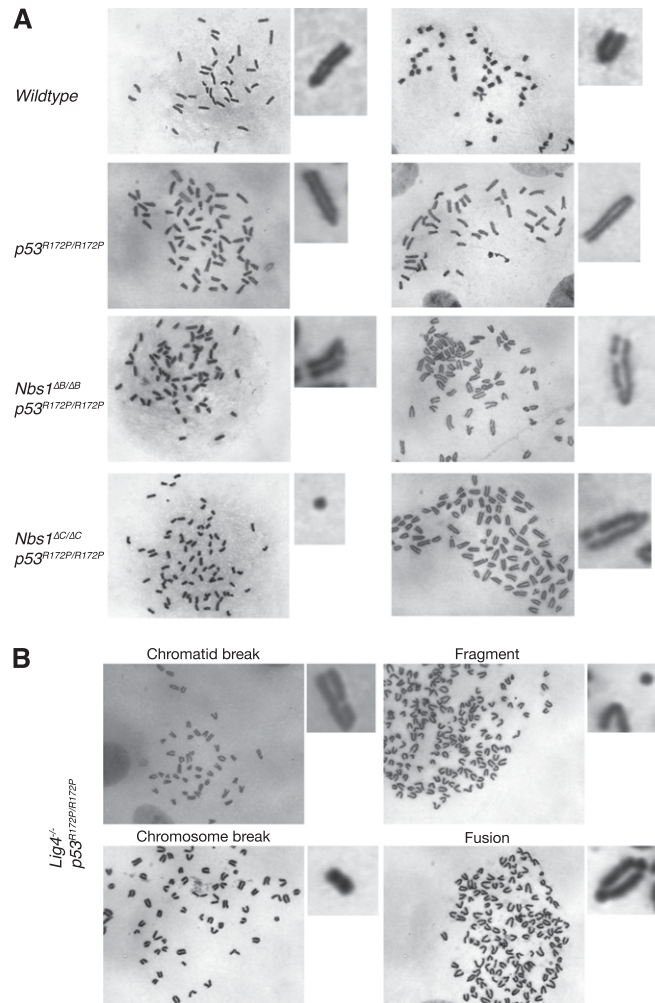

**Fig. S1.** (A) Examples of metaphase spreads used for analysis of chromosomal instability in Fig. 1E. All samples are from early-passage ear fibroblast cultures from the indicated genotypes. Examples of a chromosome fragment (Left) and a chromatid break (Right) are shown at higher magnification for  $Nbs1^{\Delta C/\Delta C} p53^{R172P/R172P}$ , and two chromatid breaks are shown for  $Nbs1^{\Delta B/\Delta B} p53^{R172P/R172P}$ . Magnified normal chromosomes are shown for wild type and  $p53^{R172P/R172P}$  genotypes. (B) Examples of  $Lig4^{-/-} p53^{R172P/R172P}$  metaphase spreads used for analysis in Fig. 3E.

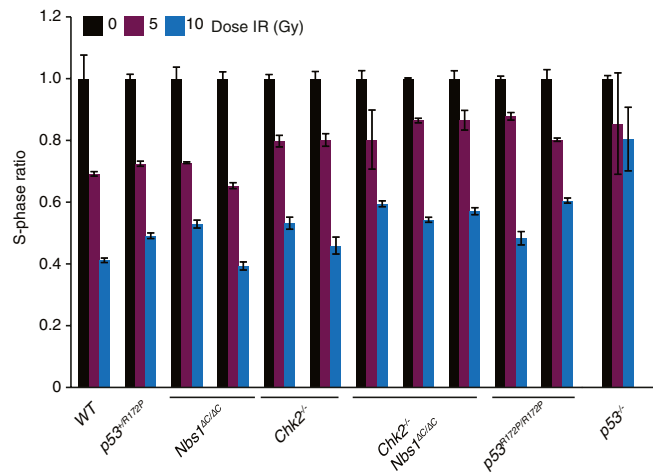

**Fig. S2.** Individual culture results for analysis of the G1/S checkpoint. S-phase ratios (%BrdU+ in ionizing radiation or mock treated samples/average %BrdU+ in mock treated samples) of triplicate samples are plotted with SD. Genotypes and ionizing radiation dose are indicated. Averaged results of each genotype are shown in Fig. 1.

**Table S1. Statistical analysis of overall cohort survival (Mantel–Cox log rank test)**

| Genotype                                                       | <i>p53</i> <sup>R172P/R172P</sup> | <i>Nbs1</i> <sup>ΔC/ΔC</sup> <i>p53</i> <sup>R172P/R172P</sup> | <i>Lig4</i> <sup>-/-</sup> <i>p53</i> <sup>R172P/R172P</sup> |
|----------------------------------------------------------------|-----------------------------------|----------------------------------------------------------------|--------------------------------------------------------------|
| <i>Chk2</i> <sup>-/-</sup> <i>Nbs1</i> <sup>ΔC/ΔC</sup>        | <0.0001                           |                                                                |                                                              |
| <i>Nbs1</i> <sup>ΔC/ΔC</sup> <i>p53</i> <sup>R172P/R172P</sup> | 0.0002                            |                                                                |                                                              |
| <i>Nbs1</i> <sup>ΔB/ΔB</sup> <i>p53</i> <sup>R172P/R172P</sup> | <0.0001                           | 0.4876                                                         |                                                              |
| <i>Lig4</i> <sup>+/-</sup> <i>p53</i> <sup>R172P/R172P</sup>   | 0.1190                            |                                                                | <0.0001                                                      |
| <i>Lig4</i> <sup>-/-</sup> <i>p53</i> <sup>R172P/R172P</sup>   | <0.0001                           |                                                                |                                                              |
| <i>Lig4</i> <sup>-/-</sup> <i>Chk2</i> <sup>-/-</sup>          | <0.0001                           |                                                                | 0.2122                                                       |

Analysis of overall cohort survival and comparison of indicated genotypes using the Mantel–Cox log rank test. Note that cohort survival of *p53*<sup>R172P/R172P</sup> mice is significantly affected by the homozygosity of either *Nbs1*<sup>ΔC</sup> or *Nbs1*<sup>ΔB</sup>.

**Table S2. Statistical analysis of overall cohort survival (6× proportional hazards model, compared with *p53*<sup>R172P/R172P</sup>)**

| Genotype                                                       | HR   | CI lower | CI upper | P value  |
|----------------------------------------------------------------|------|----------|----------|----------|
| <i>Nbs1</i> <sup>ΔC/ΔC</sup> <i>p53</i> <sup>R172P/R172P</sup> | 2.09 | -1.02    | 4.45     | 5.17e-02 |
| <i>Nbs1</i> <sup>ΔB/ΔB</sup> <i>p53</i> <sup>R172P/R172P</sup> | 4.31 | 1.92     | 9.66     | 3.52e-04 |
| <i>Lig4</i> <sup>+/-</sup> <i>p53</i> <sup>R172P/R172P</sup>   | 1.09 | -1.86    | 2.23     | 8.04e-01 |
| <i>Lig4</i> <sup>-/-</sup> <i>p53</i> <sup>R172P/R172P</sup>   | 4.40 | 2.10     | 9.20     | 2.83e-05 |
| <i>Lig4</i> <sup>-/-</sup> <i>Chk2</i> <sup>-/-</sup>          | 5.48 | 2.40     | 12.48    | 5.52e-05 |

CI, confidence interval; HR, hazard ratio.

**Table S3. Median survival of indicated cohorts**

| Genotype                                                       | Median survival (months) |
|----------------------------------------------------------------|--------------------------|
| <i>p53</i> <sup>R172P/R172P</sup>                              | 13.0                     |
| <i>Nbs1</i> <sup>ΔC/ΔC</sup> <i>p53</i> <sup>R172P/R172P</sup> | 9.2                      |
| <i>Nbs1</i> <sup>ΔB/ΔB</sup> <i>p53</i> <sup>R172P/R172P</sup> | 7.9                      |
| <i>Lig4</i> <sup>+/-</sup> <i>p53</i> <sup>R172P/R172P</sup>   | 12.0                     |
| <i>Lig4</i> <sup>-/-</sup> <i>p53</i> <sup>R172P/R172P</sup>   | 6.6                      |
| <i>Lig4</i> <sup>-/-</sup> <i>Chk2</i> <sup>-/-</sup>          | 5.2                      |

**Table S4. Numbers and percentage of tumor-free or tumor-bearing animals in each cohort**

| Genotype                                                       | No. tumor-free | % tumor-free | No. with tumor | % with tumor | Total no. |
|----------------------------------------------------------------|----------------|--------------|----------------|--------------|-----------|
| <i>p53</i> <sup>R172P/R172P</sup>                              | 2              | 15.4         | 11             | 84.6         | 13        |
| <i>Nbs1</i> <sup>ΔC/ΔC</sup> <i>p53</i> <sup>R172P/R172P</sup> | 5              | 26.3         | 14             | 73.7         | 19        |
| <i>Nbs1</i> <sup>ΔB/ΔB</sup> <i>p53</i> <sup>R172P/R172P</sup> | 2              | 12.5         | 14             | 87.5         | 16        |
| <i>Lig4</i> <sup>+/-</sup> <i>p53</i> <sup>R172P/R172P</sup>   | 0              | 0            | 21             | 100          | 21        |
| <i>Lig4</i> <sup>-/-</sup> <i>p53</i> <sup>R172P/R172P</sup>   | 16             | 57.1         | 12             | 42.9         | 28        |
| <i>Lig4</i> <sup>-/-</sup> <i>Chk2</i> <sup>-/-</sup>          | 14             | 93.3         | 1              | 6.7          | 15        |

Raw data for tumor incidence graphed in Figs. 1 and 3.

**Table S5. Statistical significance of tumor incidence (Fisher's exact test)**

| Genotype                                                       | <i>p53</i> <sup>R172P/R172P</sup> | <i>Nbs1</i> <sup>ΔC/ΔC</sup> <i>p53</i> <sup>R172P/R172P</sup> | <i>Lig4</i> <sup>-/-</sup> <i>p53</i> <sup>R172P/R172P</sup> |
|----------------------------------------------------------------|-----------------------------------|----------------------------------------------------------------|--------------------------------------------------------------|
| <i>Nbs1</i> <sup>ΔC/ΔC</sup> <i>p53</i> <sup>R172P/R172P</sup> | 0.6707                            |                                                                |                                                              |
| <i>Nbs1</i> <sup>ΔB/ΔB</sup> <i>p53</i> <sup>R172P/R172P</sup> | 1.0                               | 0.4150                                                         |                                                              |
| <i>Lig4</i> <sup>+/-</sup> <i>p53</i> <sup>R172P/R172P</sup>   | 0.1390                            |                                                                | <0.0001                                                      |
| <i>Lig4</i> <sup>-/-</sup> <i>p53</i> <sup>R172P/R172P</sup>   | 0.0181                            |                                                                |                                                              |
| <i>Lig4</i> <sup>-/-</sup> <i>Chk2</i> <sup>-/-</sup>          | <0.0001                           |                                                                | 0.0166                                                       |

**Table S6. Statistical significance of tumor incidence (6× proportional hazards model, compared with *p53*<sup>R172P/R172P</sup>)**

| Genotype                                                       | HR    | CI low | CI high | P value |
|----------------------------------------------------------------|-------|--------|---------|---------|
| <i>Nbs1</i> <sup>ΔC/ΔC</sup> <i>p53</i> <sup>R172P/R172P</sup> | 1.89  | -1.24  | 4.40    | 1.4e-01 |
| <i>Nbs1</i> <sup>ΔB/ΔB</sup> <i>p53</i> <sup>R172P/R172P</sup> | 4.49  | 1.87   | 10.82   | 7.0e-04 |
| <i>Lig4</i> <sup>+/-</sup> <i>p53</i> <sup>R172P/R172P</sup>   | 1.31  | -1.62  | 2.80    | 4.7e-01 |
| <i>Lig4</i> <sup>-/-</sup> <i>p53</i> <sup>R172P/R172P</sup>   | 2.26  | -1.09  | 5.56    | 7.5e-02 |
| <i>Lig4</i> <sup>-/-</sup> <i>Chk2</i> <sup>-/-</sup>          | -2.35 | -18.93 | 3.43    | 3.7e-01 |

**Table S7. Tumor distribution by type: percentage of total number of tumors of the indicated tumor type in each cohort**

| Tumor type                     | <i>p53</i> <sup>R172P/R172P</sup> | <i>Nbs1</i> <sup>ΔB/ΔB</sup> <i>p53</i> <sup>R172P/R172P</sup> | <i>Nbs1</i> <sup>ΔC/ΔC</sup> <i>p53</i> <sup>R172P/R172P</sup> | <i>Lig4</i> <sup>+/-</sup> <i>p53</i> <sup>R172P/R172P</sup> | <i>Lig4</i> <sup>-/-</sup> <i>p53</i> <sup>R172P/R172P</sup> | <i>Lig4</i> <sup>-/-</sup> <i>Chk2</i> <sup>-/-</sup> |
|--------------------------------|-----------------------------------|----------------------------------------------------------------|----------------------------------------------------------------|--------------------------------------------------------------|--------------------------------------------------------------|-------------------------------------------------------|
| Total no. of tumors            | 17                                | 15                                                             | 23                                                             | 27                                                           | 12                                                           | 1                                                     |
| Hemangiosarcoma                | <b>23.5</b>                       | <b>6.7</b>                                                     | <b>13.0</b>                                                    | <b>11.1</b>                                                  | 0.0                                                          | 0.0                                                   |
| Histiocytic sarcoma            | <b>17.6</b>                       | 0.0                                                            | <b>17.4</b>                                                    | <b>3.7</b>                                                   | <b>8.3</b>                                                   | 0.0                                                   |
| Lymphoma/leukemia              | <b>23.5</b>                       | <b>46.7</b>                                                    | <b>26.1</b>                                                    | <b>22.2</b>                                                  | <b>25.0</b>                                                  | 0.0                                                   |
| Rhabdomyosarcoma               | <b>5.9</b>                        | <b>6.7</b>                                                     | 0.0                                                            | <b>3.7</b>                                                   | <b>8.3</b>                                                   | 0.0                                                   |
| Alveolar-bronchiolar adenoma   | 0.0                               | 0.0                                                            | <b>4.3</b>                                                     | <b>3.7</b>                                                   | <b>16.7</b>                                                  | 0.0                                                   |
| Alveolar-bronchiolar carcinoma | 0.0                               | 0.0                                                            | <b>13.0</b>                                                    | 0.0                                                          | 0.0                                                          | 0.0                                                   |
| Basal cell carcinoma           | 0.0                               | 0.0                                                            | <b>4.3</b>                                                     | 0.0                                                          | 0.0                                                          | 0.0                                                   |
| Lipoma                         | 0.0                               | 0.0                                                            | <b>4.3</b>                                                     | 0.0                                                          | 0.0                                                          | 0.0                                                   |
| Neuroectodermal tumor          | 0.0                               | 0.0                                                            | <b>4.3</b>                                                     | <b>3.7</b>                                                   | 0.0                                                          | 0.0                                                   |
| Sarcoma                        | 0.0                               | 0.0                                                            | <b>4.3</b>                                                     | <b>11.1</b>                                                  | 0.0                                                          | 0.0                                                   |
| Squamous cell carcinoma        | 0.0                               | 0.0                                                            | <b>8.7</b>                                                     | 0.0                                                          | 0.0                                                          | 0.0                                                   |
| Fibrosarcoma                   | 0.0                               | 0.0                                                            | 0.0                                                            | <b>7.4</b>                                                   | <b>8.3</b>                                                   | 0.0                                                   |
| Adenocarcinoma                 | 0.0                               | 0.0                                                            | 0.0                                                            | <b>3.7</b>                                                   | <b>16.7</b>                                                  | 0.0                                                   |
| Gonadostromal tumor            | 0.0                               | 0.0                                                            | 0.0                                                            | 0.0                                                          | <b>8.3</b>                                                   | 0.0                                                   |
| Granulosa cell tumor           | 0.0                               | 0.0                                                            | 0.0                                                            | 0.0                                                          | 0.0                                                          | <b>100.0</b>                                          |
| Medulloblastoma                | 0.0                               | 0.0                                                            | 0.0                                                            | <b>3.7</b>                                                   | 0.0                                                          | 0.0                                                   |
| Cholangiosarcoma               | 0.0                               | 0.0                                                            | 0.0                                                            | <b>3.7</b>                                                   | 0.0                                                          | 0.0                                                   |
| Sebaceous adenoma              | 0.0                               | 0.0                                                            | 0.0                                                            | <b>3.7</b>                                                   | 0.0                                                          | 0.0                                                   |
| Osteosarcoma                   | 0.0                               | 0.0                                                            | 0.0                                                            | <b>7.4</b>                                                   | 0.0                                                          | 0.0                                                   |
| Uncharacterized                | <b>29.4</b>                       | <b>40.0</b>                                                    | 0.0                                                            | <b>11.1</b>                                                  | <b>8.3</b>                                                   | 0.0                                                   |

Bold type indicates the percentage of the cohort with the indicated tumor type. The number of tumors is higher than the number of tumor-bearing mice, because some mice had two or three distinct lesions.

**Table S8. Breeding schemes and outcomes used to generate double-mutant mice**

| Genotype                                                     | Expected no. of pups | Observed no. of pups | Ratio observed/expected | P value*                |
|--------------------------------------------------------------|----------------------|----------------------|-------------------------|-------------------------|
| <i>Lig4</i> <sup>-/-</sup>                                   | 10.06 <sup>†</sup>   | 0                    | 0.00                    | 3.07 × 10 <sup>-5</sup> |
| <i>Lig4</i> <sup>-/-</sup> <i>p53</i> <sup>R172P/R172P</sup> | 57 <sup>‡</sup>      | 47                   | 0.82                    |                         |
| <i>Lig4</i> <sup>-/-</sup> <i>Chk2</i> <sup>-/-</sup>        | 32 <sup>§</sup>      | 19                   | 0.59                    | 7.55 × 10 <sup>-7</sup> |
| <i>Lig4</i> <sup>-/-</sup> <i>Nbs1</i> <sup>ΔC/ΔC</sup>      | 12.25 <sup>¶</sup>   | 0                    | 0.00                    |                         |
| <i>Lig4</i> <sup>+/-</sup> <i>p53</i> <sup>R172P/R172P</sup> | 114 <sup>‡</sup>     | 122                  | 1.07                    |                         |
| <i>p53</i> <sup>R172P/R172P</sup>                            | 57 <sup>‡</sup>      | 59                   | 1.04                    |                         |
| <i>Lig4</i> <sup>+/-</sup> <i>Chk2</i> <sup>-/-</sup>        | 64 <sup>§</sup>      | 69                   | 1.08                    |                         |
| <i>Chk2</i> <sup>-/-</sup>                                   | 32 <sup>§</sup>      | 40                   | 1.25                    |                         |
| <i>Nbs1</i> <sup>ΔC/ΔC</sup>                                 | 12.25 <sup>¶</sup>   | 20                   | 1.63                    |                         |
| <i>Lig4</i> <sup>+/-</sup> <i>Nbs1</i> <sup>ΔC/ΔC</sup>      | 24.5 <sup>¶</sup>    | 29                   | 1.18                    |                         |

Expected number of pups assumes normal Mendelian inheritance.

\*P values are based on binomial distribution.

<sup>†</sup>One hundred sixty-one pups generated from breeding pairs with a 1 in 16 chance of generating *Lig4*<sup>-/-</sup>.

<sup>‡</sup>Two hundred twenty-eight pups generated from 10 independent *Lig4*<sup>+/-</sup> *p53*<sup>R172P/R172P</sup> × *Lig4*<sup>+/-</sup> *p53*<sup>R172P/R172P</sup> breeding pairs.

<sup>§</sup>One hundred twenty-eight pups generated from seven independent *Lig4*<sup>+/-</sup> *Chk2*<sup>-/-</sup> × *Lig4*<sup>+/-</sup> *Chk2*<sup>-/-</sup> breeding pairs.

<sup>¶</sup>Forty-nine pups generated from four independent *Lig4*<sup>+/-</sup> *Nbs1*<sup>ΔC/ΔC</sup> × *Lig4*<sup>+/-</sup> *Nbs1*<sup>ΔC/ΔC</sup> breeding pairs.
